# Supplementary material for: Bioinformatics analysis identifies biomarkers associated with poor prognosis in diffuse-type gastric cancer
Source: PubMed Central journal article supplement — Mol Med Rep. 2021 Jan 7;23(3):193. doi: 10.3892/mmr.2021.11832 (PMC7809905; doi:10.3892/mmr.2021.11832), 2021-01-07

Figure S1. Gene Ontology-enriched functional analysis of DEGs and PPI network of diffuse-type GC DEGs. (A) Diffuse-type DEGs. (B) Intestinal-type DEGs. (C) PPI network of diffuse type DEGs. Node colors represent the logFC of genes, with darker shades of blue indicating higher log<sub>10</sub>FC values. Node size is proportional to gene connectedness. DEG, differentially expressed gene; PPI, protein-protein interaction; FC, fold change.

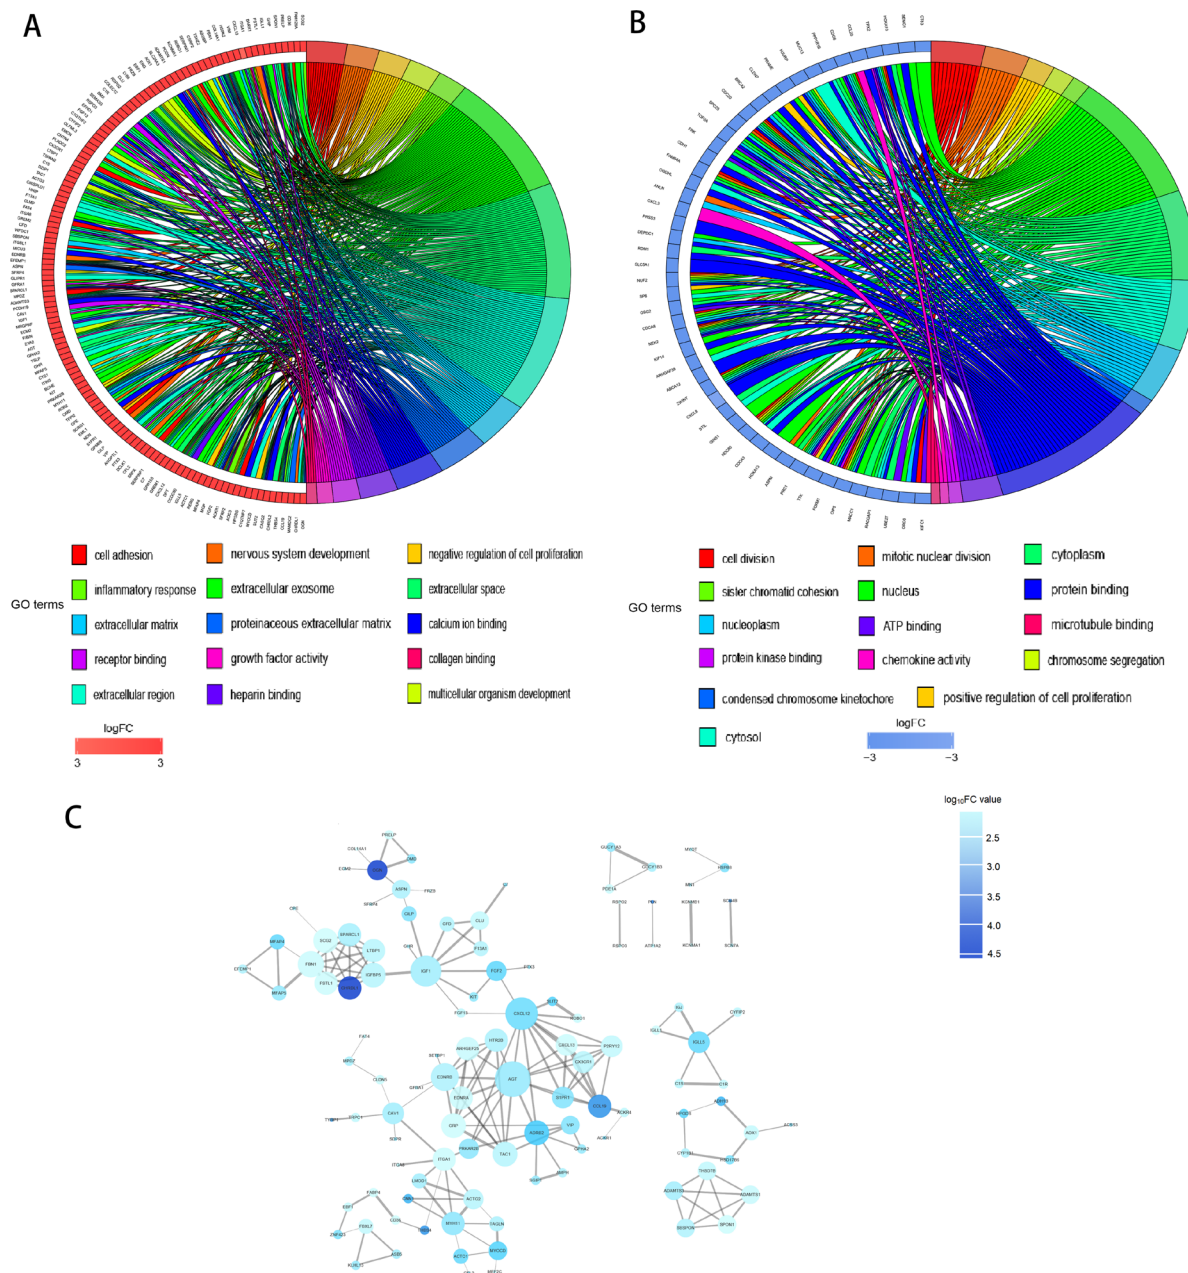

Supplement: Supplementary_Data1.pdf [file Supplementary_Data1.pdf]
